# Supplementary material for: Multi-observational estimation of regional and sectoral emission contributions to the persistent high growth rate of atmospheric CH 4 for 2020–2022
Source: Copernicus journal article supplement (doi:10.5194/acp-25-6757-2025), 2025-07-07
Supplement: Supplementary file 1 [file acp-25-6757-2025-supplement.zip]

Supplementary\_material\_S2

| No.                                                               | code  | aircraft obs.                                                            | latitude      | longitude      | altitude | Institute(s)            | ObsPack/source/type                        |
|-------------------------------------------------------------------|-------|--------------------------------------------------------------------------|---------------|----------------|----------|-------------------------|--------------------------------------------|
| GLOBALVIEWplus_v6.0_2023-12-01, obspack_ch4_1_NRT_v6.0_2023-11-30 |       |                                                                          |               |                |          |                         |                                            |
| 1                                                                 | SAN   | Santarem                                                                 | -2.85         | -54.95         | 78       | INPE                    | san_aircraft-pfp_433_representative        |
| 2                                                                 | TEF   | Tefe                                                                     | -3.6          | -66.5          | -1E+34   | INPE                    | tef_aircraft-pfp_433_representative        |
| 3                                                                 | ALF   | Alta Floresta                                                            | -8.92         | -56.79         | -1E+34   | INPE                    | alf_aircraft-pfp_433_representative        |
| 4                                                                 | RBA-B | Rio Branco                                                               | -9.36         | -67.6          | -1E+34   | INPE                    | rba-b_aircraft-pfp_433_representative      |
| 5                                                                 | SAH   | Salinopolis High                                                         | -0.8546       | -48.1834       | 20       | INPE                    | sah_aircraft-pfp_433_representative        |
| 6                                                                 | IAGOS | In-service Aircraft for a Global Observing System                        | -1E+34        | -1E+34         | -1E+34   | KIT/IMK-ASF,IAU         | iagos-caribic_aircraft-flask_457_allvalid  |
| 7                                                                 | IAGOS | In-service Aircraft for a Global Observing System                        | -1E+34        | -1E+34         | -1E+34   | KIT/IMK-ASF,MPI-BGC,IAU | iagos-caribic_aircraft-insitu_457_allvalid |
| 8                                                                 | IAGOS | In-service Aircraft for a Global Observing System                        | -1E+34        | -1E+34         | -1E+34   | MPI-BGC                 | iagos-core_aircraft-insitu_45_allvalid     |
| 9                                                                 | AJAX  | Alpha Jet Atmospheric eXperiment (AJAX)                                  | -1E+34        | -1E+34         | -1E+34   | NASA-Ames               | ajax_aircraft-insitu_429_allvalid          |
| 10                                                                | LARC  | LARC - NASA Langley Research Center Aircraft Campaign                    | -1E+34        | -1E+34         | -1E+34   | NASA-LaRC               | korus-aq_aircraft-insitu_428_allvalid-dc8  |
| 11                                                                | ACT   | Atmospheric Carbon and Transport - America                               | -1E+34        | -1E+34         | -1E+34   | NASA-LaRC               | act_aircraft-insitu_428_allvalid-b200      |
| 12                                                                | ACT   | Atmospheric Carbon and Transport - America                               | -1E+34        | -1E+34         | -1E+34   | NASA-LaRC               | act_aircraft-insitu_428_allvalid-c130      |
| 13                                                                | ORC   | ORCAS (O2/N2 Ratio and CO2 Airborne Southern Ocean Study)                | -1E+34        | -1E+34         | -1E+34   | NCAR,NOAA               | orc_aircraft-insitu_3_allvalid-merge10     |
| 14                                                                | CON   | CONTRAIL (Comprehensive Observation Network for TRace gases by AirLiner) | -1E+34        | -1E+34         | -1E+34   | NIES,MRI                | con_aircraft-flask_42_allvalid             |
| 15                                                                | PFA   | Poker Flat, Alaska                                                       | 64.9          | -148.76        | 210      | NOAA                    | pfa_aircraft-pfp_1_allvalid                |
| 16                                                                | HIL   | Homer, Illinois                                                          | 40.07         | -87.91         | 201.5    | NOAA                    | hil_aircraft-pfp_1_allvalid                |
| 17                                                                | ESP   | Estevan Point, British Columbia                                          | 49.383        | -126.5441      | 7        | NOAA                    | esp_aircraft-pfp_1_allvalid                |
| 18                                                                | LEF   | Park Falls, Wisconsin                                                    | 45.9451       | -90.2732       | 472      | NOAA                    | lef_aircraft-pfp_1_allvalid                |
| 19                                                                | SCA   | Offshore Charleston, South Carolina                                      | 32.77         | -79.55         | 0        | NOAA                    | sca_aircraft-pfp_1_allvalid                |
| 20                                                                | NHA   | Offshore Portsmouth, New Hampshire (Isles of Shoals)                     | 42.95         | -70.63         | 0        | NOAA                    | nha_aircraft-pfp_1_allvalid                |
| 21                                                                | CMA   | Offshore Cape May, New Jersey                                            | 38.83         | -74.32         | 0        | NOAA                    | cma_aircraft-pfp_1_allvalid                |
| 22                                                                | WBI   | West Branch, Iowa                                                        | 41.7248       | -91.3529       | 241.7    | NOAA                    | wbi_aircraft-pfp_1_allvalid                |
| 23                                                                | CAR   | Briggsdale, Colorado                                                     | 40.6347       | -104.3269      | 1488     | NOAA                    | car_aircraft-pfp_1_allvalid                |
| 24                                                                | ETL   | East Trout Lake, Saskatchewan                                            | 54.3541       | -104.9868      | 493      | NOAA                    | etl_aircraft-pfp_1_allvalid                |
| 25                                                                | TGC   | Offshore Corpus Christi, Texas                                           | 27.73         | -96.86         | 0        | NOAA                    | tgc_aircraft-pfp_1_allvalid                |
| 26                                                                | THD   | Trinidad Head, California                                                | 41.0541       | -124.151       | 107      | NOAA                    | thd_aircraft-pfp_1_allvalid                |
| 27                                                                | RTA   | Rarotonga                                                                | -21.25        | -159.83        | 3        | NOAA                    | rta_aircraft-pfp_1_allvalid                |
| 28                                                                | SGP   | Southern Great Plains, Oklahoma                                          | 36.607        | -97.489        | 314      | NOAA                    | sgp_aircraft-pfp_1_allvalid                |
| 29                                                                | CRV   | Carbon in Arctic Reservoirs Vulnerability Experiment (CARVE)             | 64.9863       | -147.598       | 611.43   | NOAA                    | crv_aircraft-pfp_1_allvalid                |
| 30                                                                | DND   | Dahlen, North Dakota                                                     | 47.5          | -99.24         | 472.44   | NOAA                    | dnd_aircraft-pfp_1_allvalid                |
| 31                                                                | MRC   | Marcellus Pennsylvania                                                   | 41.4662       | -76.4188       | 592      | NOAA                    | mrc_aircraft-pfp_1_allvalid                |
| 32                                                                | INX   | INFLUX (Indianapolis Flux Experiment)                                    | 39.5805       | -86.4207       | -1E+34   | NOAA                    | inx_aircraft-pfp_1_allvalid                |
| 33                                                                | ACG   | Alaska Coast Guard                                                       | 57.7366       | -152.5042      | 6        | NOAA                    | acg_aircraft-pfp_1_allvalid                |
| 34                                                                | ACT   | Atmospheric Carbon and Transport - America                               | -1E+34        | -1E+34         | -1E+34   | NOAA                    | act_aircraft-pfp_1_allvalid-b200           |
| 35                                                                | ACT   | Atmospheric Carbon and Transport - America                               | -1E+34        | -1E+34         | -1E+34   | NOAA                    | act_aircraft-pfp_1_allvalid-c130           |
| 36                                                                | TOM   | Atmospheric Tomography Mission (ATom)                                    | -1E+34        | -1E+34         | -1E+34   | NOAA                    | tom_aircraft-pfp_1_allvalid                |
| 37                                                                | TOM   | Atmospheric Tomography Mission (ATom)                                    | -1E+34        | -1E+34         | -1E+34   | NOAA                    | tom_aircraft-insitu_1_allvalid             |
| 38                                                                | CRV   | Carbon in Arctic Reservoirs Vulnerability Experiment (CARVE)             | -1E+34        | -1E+34         | -1E+34   | NOAA                    | above_aircraft-insitu_1_allvalid           |
| 39                                                                | MAN   | Manaus                                                                   | -2.5950000286 | -60.2089996338 | 45       | NOAA                    | man_aircraft-insitu_1_allvalid             |
| 40                                                                | ECO   | East Coast Outflow                                                       | -1E+34        | -1E+34         | -1E+34   | NOAA                    | eco_aircraft-insitu_1_allvalid             |
| 41                                                                | UGD   | Kajjansi Airfield, Kampala, Uganda                                       | 0.2           | 32.55          | 1141     | NOAA                    | ugd_aircraft-insitu_1_allvalid             |
| JMA                                                               |       |                                                                          |               |                |          |                         |                                            |
| 42                                                                | AOA   | Aircraft Observation of Atmospheric trace gases by JMA                   | -1E+34        | -1E+34         | -1E+34   | JMA                     | flask                                      |
| Tohoku University                                                 |       |                                                                          |               |                |          |                         |                                            |
| 43                                                                | PIP   | Aircraft (off the Pacific coast of Sendai)                               | -1E+34        | -1E+34         | -1E+34   | TU                      | flask                                      |
| 44                                                                | TDA   | Aircraft (over Japan and mainland)                                       | -1E+34        | -1E+34         | -1E+34   | TU                      | flask                                      |
| NIES Aircraft                                                     |       |                                                                          |               |                |          |                         |                                            |
| 45                                                                | NOV   | Novosibirsk                                                              | -1E+34        | -1E+34         | -1E+34   | NIES                    | flask                                      |
| 46                                                                | SUR   | Surgut                                                                   | -1E+34        | -1E+34         | -1E+34   | NIES                    | flask                                      |
| 47                                                                | YAK   | Yakutsk                                                                  | -1E+34        | -1E+34         | -1E+34   | NIES                    | flask                                      |
