# Supplementary material for: Multi-observational estimation of regional and sectoral emission contributions to the persistent high growth rate of atmospheric CH 4 for 2020–2022
Source: Copernicus journal article supplement (doi:10.5194/acp-25-6757-2025), 2025-07-07
Supplement: Supplementary file 2 [file acp-25-6757-2025-supplement.zip]

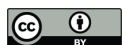

*Supplement of*

**Multi-observational estimation of regional and sectoral emission contributions to the persistent high growth rate of atmospheric CH<sub>4</sub> for 2020–2022**

**Yosuke Niwa et al.**

*Correspondence to:* Yosuke Niwa ([niwa.yosuke@nies.go.jp](mailto:niwa.yosuke@nies.go.jp))

- [acp-25-6757-2025-supplement-title-page.pdf](#)
- [Supplementary\\_material\\_S1.pdf](#)
- [Supplementary\\_material\\_S2.pdf](#)

The copyright of individual parts of the supplement might differ from the article licence.
