# Supplementary material for: Multi-observational estimation of regional and sectoral emission contributions to the persistent high growth rate of atmospheric CH 4 for 2020–2022
Source: Copernicus journal article supplement (doi:10.5194/acp-25-6757-2025), 2025-07-07
Supplement: Supplementary file 3 [file acp-25-6757-2025-supplement.zip]

Supplementary\_material\_S1

| No.                                                               | code  | surface sites                                                   | latitude | longitude | altitude | Institute(s)               | ObsPack/source/type                   |
|-------------------------------------------------------------------|-------|-----------------------------------------------------------------|----------|-----------|----------|----------------------------|---------------------------------------|
| GLOBALVIEWplus_v6.0_2023-12-01, obspack_ch4_1_NRT_v6.0_2023-11-30 |       |                                                                 |          |           |          |                            |                                       |
| 1                                                                 | IZO   | Izana, Tenerife, Canary Islands                                 | 28.309   | -16.499   | 2372.9   | AEMET                      | izo_surface-insitu_27_allvalid        |
| 2                                                                 | KAS   | Kasprowy Wierch, High Tatra                                     | 49.2325  | 19.9818   | 1989     | AGH                        | kas_surface-insitu_53_allvalid        |
| 3                                                                 | SNO   | Station Nord                                                    | 81.3605  | -16.3943  | 24       | AU,ICOS RI,ICOS-ATC        | sno_tower-insitu_464_allvalid-85magl  |
| 4                                                                 | RUN   | La Réunion                                                      | -21.0796 | 55.3841   | 2154     | BIRA-IASB,ICOS RI,ICOS-ATC | run_surface-insitu_472_allvalid       |
| 5                                                                 | KRE   | Kresin u Pacova                                                 | 49.583   | 15.083    | 534      | CAS,ICOS,ICOS-ATC,ICOS RI  | kre_tower-insitu_441_allvalid-250magl |
| 6                                                                 | CVO   | Cape Verde Observatory                                          | 16.864   | -24.8675  | 10       | CEDA,MPI-BGC               | cvo_surface-insitu_456_allvalid       |
| 7                                                                 | CMN   | Mt. Cimone Station                                              | 44.1936  | 10.6999   | 2165     | CNR-ISAC,ICOS RI,ICOS-ATC  | cmn_surface-insitu_443_allvalid       |
| 8                                                                 | CGO   | Cape Grim, Tasmania                                             | -40.683  | 144.69    | 94       | CSIRO                      | cgo_surface-insitu_2_allvalid         |
| 9                                                                 | MQA   | Macquarie Island                                                | -54.483  | 158.967   | 6        | CSIRO                      | mqa_surface-flask_2_representative    |
| 10                                                                | SPO   | South Pole, Antarctica                                          | -89.98   | -24.8     | 2810     | CSIRO                      | spo_surface-flask_2_representative    |
| 11                                                                | CFA   | Cape Ferguson, Queensland                                       | -19.28   | 147.057   | 2        | CSIRO                      | cfa_surface-flask_2_representative    |
| 12                                                                | MAA   | Mawson Station, Antarctica                                      | -67.617  | 62.867    | 32       | CSIRO                      | maa_surface-flask_2_representative    |
| 13                                                                | CGO   | Cape Grim, Tasmania                                             | -40.683  | 144.69    | 94       | CSIRO                      | cgo_surface-flask_2_representative    |
| 14                                                                | MLO   | Mauna Loa, Hawaii                                               | 19.5362  | -155.5763 | 3397     | CSIRO                      | mlo_surface-flask_2_representative    |
| 15                                                                | CYA   | Casey, Antarctica                                               | -66.283  | 110.517   | 47       | CSIRO                      | cya_surface-flask_2_representative    |
| 16                                                                | ALT   | Alert, Nunavut                                                  | 82.4508  | -62.5072  | 185      | CSIRO                      | alt_surface-flask_2_representative    |
| 17                                                                | GPA   | Gunn Point                                                      | -12.2488 | 131.0453  | 25       | CSIRO                      | gpa_surface-flask_2_representative    |
| 18                                                                | HPB   | Hohenpeissenberg                                                | 47.8011  | 11.0245   | 985      | DWD,ICOS RI,ICOS-ATC       | hpb_tower-insitu_147_allvalid-131magl |
| 19                                                                | LIN   | Lindenberg                                                      | 52.1663  | 14.1226   | 73       | DWD,ICOS RI,ICOS-ATC       | lin_tower-insitu_147_allvalid-98magl  |
| 20                                                                | GAT   | Gartow                                                          | 53.0657  | 11.4429   | 70       | DWD,ICOS RI,ICOS-ATC       | gat_tower-insitu_147_allvalid-341magl |
| 21                                                                | KIT   | Karlsruhe                                                       | 49.0915  | 8.4249    | 110      | DWD,ICOS RI,ICOS-ATC       | kit_tower-insitu_147_allvalid-200magl |
| 22                                                                | TOH   | Torfhaus                                                        | 51.8088  | 10.535    | 801      | DWD,ICOS RI,ICOS-ATC       | toh_tower-insitu_147_allvalid-147magl |
| 23                                                                | STE   | Steinkimmen                                                     | 53.0431  | 8.4588    | 29       | DWD,ICOS RI,ICOS-ATC       | ste_tower-insitu_147_allvalid-252magl |
| 24                                                                | OXK   | Ochsenkopf                                                      | 50.0301  | 11.8084   | 1022     | DWD,ICOS RI,ICOS-ATC       | oxk_tower-insitu_147_allvalid-163magl |
| 25                                                                | JUE   | Jülich                                                          | 50.9102  | 6.4096    | 98       | DWD,ICOS RI,ICOS-ATC       | jue_tower-insitu_147_allvalid-120magl |
| 26                                                                | HEL   | Helgoland                                                       | 54.1804  | 7.8832    | 43       | DWD,ICOS RI,ICOS-ATC       | hel_surface-insitu_147_allvalid       |
| 27                                                                | FNE   | Fort Nelson, British Columbia                                   | 58.8412  | -122.5737 | 361      | ECCC                       | fne_surface-insitu_6_allvalid         |
| 28                                                                | ABT   | Abbotsford, British Columbia                                    | 49.0114  | -122.3353 | 60       | ECCC                       | abt_surface-insitu_6_allvalid         |
| 29                                                                | EGB   | Egbert, Ontario                                                 | 44.231   | -79.7838  | 251      | ECCC                       | egb_surface-insitu_6_allvalid         |
| 30                                                                | HNP   | Hanlan\'s Point, Ontario                                        | 43.6122  | -79.3887  | 87       | ECCC                       | hnp_surface-insitu_6_allvalid         |
| 31                                                                | ALT   | Alert, Nunavut                                                  | 82.4508  | -62.5072  | 185      | ECCC                       | alt_surface-insitu_6_allvalid         |
| 32                                                                | FSD   | Fraserdale                                                      | 49.8752  | -81.57    | 210      | ECCC                       | fsd_surface-insitu_6_allvalid         |
| 33                                                                | CPS   | Chapais,Quebec                                                  | 49.8223  | -74.9753  | 391      | ECCC                       | cps_surface-insitu_6_allvalid         |
| 34                                                                | TAO   | Toronto Atmospheric Observatory, University of Toronto, Ontario | 43.66    | -79.4     | 100      | ECCC                       | tao_surface-insitu_6_allvalid         |
| 35                                                                | TPD   | Turkey Point, Ontario                                           | 42.6354  | -80.5577  | 231      | ECCC                       | tpd_surface-insitu_6_allvalid         |
| 36                                                                | BRA   | Bratt\'s Lake Saskatchewan                                      | 50.2017  | -104.7113 | 595      | ECCC                       | bra_surface-insitu_6_allvalid         |
| 37                                                                | CHL   | Churchill, Manitoba                                             | 58.7379  | -93.8194  | 29       | ECCC                       | chl_surface-insitu_6_allvalid         |
| 38                                                                | ETL   | East Trout Lake, Saskatchewan                                   | 54.3541  | -104.9868 | 493      | ECCC                       | etl_surface-insitu_6_allvalid         |
| 39                                                                | LLB   | Lac La Biche, Alberta                                           | 54.9538  | -112.4666 | 540      | ECCC                       | llb_surface-insitu_6_allvalid         |
| 40                                                                | INU   | Inuvik,Northwest Territories                                    | 68.3178  | -133.5342 | 113      | ECCC                       | inu_surface-insitu_6_allvalid         |
| 41                                                                | EST   | Esther, Alberta                                                 | 51.6707  | -110.206  | 707      | ECCC                       | est_surface-insitu_6_allvalid         |
| 42                                                                | CBY   | Cambridge Bay, Nunavut Territory                                | 69.1284  | -105.0577 | 35       | ECCC                       | cby_surface-insitu_6_allvalid         |
| 43                                                                | BCK   | Behchoko, Northwest Territories                                 | 62.7981  | -115.9194 | 160      | ECCC                       | bck_surface-insitu_6_allvalid         |
| 44                                                                | ESP   | Estevan Point, British Columbia                                 | 49.383   | -126.5441 | 7        | ECCC                       | esp_surface-insitu_6_allvalid         |
| 45                                                                | WSA   | Sable Island, Nova Scotia                                       | 43.9322  | -60.0093  | 5        | ECCC                       | wsa_surface-insitu_6_allvalid         |
| 46                                                                | BLK   | Baker Lake, Nunavut                                             | 64.3317  | -96.0104  | 51       | ECCC                       | blk_surface-insitu_6_allvalid         |
| 47                                                                | JFJ   | Jungfrauoch                                                     | 46.55    | 7.987     | 3570     | EMPA                       | jfj_surface-insitu_5_allvalid         |
| 48                                                                | LHW   | Laegern-Hochwacht                                               | 47.4822  | 8.3973    | 840      | EMPA,ICOS RI               | lhw_surface-insitu_5_allvalid         |
| 49                                                                | JAR   | Järvselja                                                       | 58.2776  | 27.3082   | 36       | EMU,ICOS RI                | jar_tower-insitu_475_allvalid-110magl |
| 50                                                                | GHG09 | United Telephone Mutual Aid Corp, Munich, ND                    | 48.6661  | -98.8414  | 485.85   | EN                         | ghg09_surface-insitu_112_allvalid     |
| 51                                                                | GHG03 | Robert D Summey - Nickelsville, Dublin, GA                      | 32.6542  | -83.0297  | 107.9    | EN                         | ghg03_surface-insitu_112_allvalid     |
| 52                                                                | GHG06 | City of Bagley, Bagley, MN                                      | 47.5206  | -95.4256  | 453.24   | EN                         | ghg06_surface-insitu_112_allvalid     |
| 53                                                                | THD   | Trinidad Head, California                                       | 41.0541  | -124.151  | 107      | EN,SIO                     | thd_surface-insitu_112_allvalid       |
| 54                                                                | LMP   | Lampedusa                                                       | 35.5181  | 12.6322   | 45       | ENEA,ICOS RI,ICOS-ATC      | lmp_surface-insitu_28_allvalid        |
| 55                                                                | UTO   | Uto                                                             | 59.7839  | 21.3672   | 8        | FMI,ICOS RI,ICOS-ATC       | uto_surface-insitu_30_allvalid        |
| 56                                                                | PAL   | Pallas-Sammaltunturi, GAW Station                               | 67.9733  | 24.1157   | 565      | FMI,ICOS RI,ICOS-ATC       | pal_surface-insitu_30_allvalid        |
| 57                                                                | PAL   | Pallas-Sammaltunturi, GAW Station                               | 67.9733  | 24.1157   | 565      | FMI,ICOS RI,ICOS-ATC       | pal_surface-insitu_30_nonlocal        |
| 58                                                                | PAL   | Pallas-Sammaltunturi, GAW Station                               | 67.9733  | 24.1157   | 565      | FMI,ICOS RI,ICOS-ATC       | pal_surface-insitu_30_continental     |
| 59                                                                | PAL   | Pallas-Sammaltunturi, GAW Station                               | 67.9733  | 24.1157   | 565      | FMI,ICOS RI,ICOS-ATC       | pal_surface-insitu_30_marine          |
| 60                                                                | PUI   | Puijo                                                           | 62.9096  | 27.6549   | 232      | FMI,ICOS RI,ICOS-ATC       | pui_tower-insitu_30_allvalid-84magl   |
| 61                                                                | HUN   | Hegyhatsal                                                      | 46.9559  | 16.6521   | 248      | HMS                        | hun_tower-insitu_35_allvalid-115magl  |
| 62                                                                | GIC   | Sierra de Gredos                                                | 40.3457  | -5.1755   | 1436     | ICTA-UAB                   | gic_surface-insitu_431_allvalid       |
| 63                                                                | DEC   | Delta de l'Ebre                                                 | 40.7439  | 0.7867    | 5        | ICTA-UAB                   | dec_surface-insitu_431_allvalid       |

|     |     |                                                              |          |           |        |                           |                                       |
|-----|-----|--------------------------------------------------------------|----------|-----------|--------|---------------------------|---------------------------------------|
| 64  | EEC | El Estrecho                                                  | 36.0586  | -5.664    | 20     | ICTA-UAB                  | eec_surface-insitu_431_allvalid       |
| 65  | VAC | Valderejo                                                    | 42.8786  | -3.2139   | 1102   | ICTA-UAB                  | vac_surface-insitu_431_allvalid       |
| 66  | SGC | Sierra de Grazalema                                          | 36.6956  | -5.3975   | 850    | ICTA-UAB                  | sgc_surface-insitu_431_allvalid       |
| 67  | LMU | La Muela                                                     | 41.5941  | -1.1003   | 571    | ICTA-UAB                  | lmu_surface-insitu_431_allvalid       |
| 68  | CBW | Cabauw                                                       | 51.9703  | 4.9264    | 0      | IMAU                      | cbw_surface-insitu_118_allvalid       |
| 69  | LUT | Lutjewad                                                     | 53.4037  | 6.3529    | 1      | IMAU                      | lut_surface-insitu_118_allvalid       |
| 70  | KRK | Krakow                                                       | 50.067   | 19.913    | 220    | IMAU                      | krk_surface-insitu_118_allvalid       |
| 71  | IPR | Ispra                                                        | 45.807   | 8.63      | 223    | JRC,ICOS RI,ICOS-ATC      | ipr_tower-insitu_103_allvalid-100magl |
| 72  | GSN | Gosan, Cheju Island                                          | 33.28    | 126.15    | 72     | KMA                       | gsn_surface-insitu_61_allvalid        |
| 73  | AMY | Anmyeon-do                                                   | 36.5389  | 126.3295  | 47     | KMA                       | amy_surface-insitu_61_allvalid        |
| 74  | ULD | Ulleungdo                                                    | 37.48    | 130.9     | 220.9  | KMA                       | uld_surface-insitu_61_allvalid        |
| 75  | MKN | Mt. Kenya                                                    | -0.0622  | 37.2972   | 3644   | KMD                       | mkn_surface-insitu_701_allvalid       |
| 76  | BRM | Beromunster                                                  | 47.1896  | 8.1755    | 797    | KUP                       | brm_tower-insitu_49_allvalid-212magl  |
| 77  | CRA | Centre de Recherches Atmosphériques                          | 43.1298  | 0.3692    | 600    | LA,ICOS RI,ICOS-ATC       | cra_tower-insitu_188_allvalid-60magl  |
| 78  | MLH | Malin Head                                                   | 55.355   | -7.333    | 22     | LATMOS,ICOS RI            | mlh_surface-insitu_468_allvalid       |
| 79  | OLI | Oliktok Point, Alaska                                        | 70.4953  | -149.8869 | 2      | LBNL-ARM                  | oli_surface-insitu_64_allvalid-10magl |
| 80  | ENA | Eastern North Atlantic, Graciosa, Azores                     | 39.0916  | -28.0257  | 30.48  | LBNL-ARM                  | ena_surface-insitu_64_allvalid-10magl |
| 81  | SGP | Southern Great Plains, Oklahoma                              | 36.607   | -97.489   | 314    | LBNL-ARM                  | sgp_surface-insitu_64_allvalid-60magl |
| 82  | PDM | Pic Du Midi                                                  | 42.9372  | 0.1411    | 2877   | LSCE                      | pdm_surface-insitu_11_allvalid        |
| 83  | FKL | Finokalia, Crete                                             | 35.3378  | 25.6694   | 250    | LSCE                      | fkl_surface-insitu_11_allvalid        |
| 84  | MHD | Mace Head, County Galway                                     | 53.326   | -9.899    | 5      | LSCE                      | mhd_surface-insitu_11_allvalid        |
| 85  | BIS | Biscarrosse                                                  | 44.3781  | -1.2311   | 167    | LSCE,ICOS RI              | bis_surface-insitu_11_allvalid        |
| 86  | ERS | ERSA                                                         | 42.9692  | 9.3801    | 533    | LSCE,ICOS RI              | ers_surface-insitu_11_allvalid        |
| 87  | TRN | Trainou                                                      | 47.9647  | 2.1125    | 131    | LSCE,ICOS RI,ICOS-ATC     | trn_tower-insitu_11_allvalid-180magl  |
| 88  | SAC | Saclay                                                       | 48.7227  | 2.142     | 160    | LSCE,ICOS RI,ICOS-ATC     | sac_tower-insitu_11_allvalid-100magl  |
| 89  | ROC | Roc'h Trédudon                                               | 48.4133  | -3.8895   | 362    | LSCE,ICOS RI,ICOS-ATC     | roc_tower-insitu_11_allvalid-140magl  |
| 90  | PUY | Puy de Dome                                                  | 45.7719  | 2.9658    | 1465   | LSCE,ICOS-ATC,ICOS RI     | puy_surface-insitu_11_allvalid        |
| 91  | OPE | Observatoire perenne de l'environnement                      | 48.5619  | 5.5036    | 390    | LSCE,ICOS-ATC,ICOS RI     | ope_tower-insitu_11_allvalid-120magl  |
| 92  | HTM | Hyltemossa                                                   | 56.0976  | 13.4189   | 198.4  | LUND-CEC,ICOS-ATC,ICOS RI | htm_tower-insitu_424_allvalid-150magl |
| 93  | NOR | Norunda                                                      | 60.0864  | 17.4794   | 46     | LUND-CEC,ICOS-ATC,ICOS RI | nor_tower-insitu_424_allvalid-100magl |
| 94  | TIK | Hydrometeorological Observatory of Tiksi                     | 71.5965  | 128.8887  | 19     | MGO,FMI,ICOS RI,ICOS-ATC  | tik_surface-insitu_55_allvalid        |
| 95  | ALT | Alert, Nunavut                                               | 82.4508  | -62.5072  | 185    | MPI-BGC                   | alt_surface-flask_45_representative   |
| 96  | SIS | Shetland Islands                                             | 60.089   | -1.255    | 30     | MPI-BGC                   | sis_surface-flask_45_representative   |
| 97  | KJN | Kjolnes                                                      | 70.85    | 29.23     | 0      | MPI-BGC                   | kjn_surface-flask_45_representative   |
| 98  | NAM | Gobabeb                                                      | -23.56   | 15.05     | 410    | MPI-BGC                   | nam_surface-flask_45_representative   |
| 99  | JFJ | Jungfrauoch                                                  | 46.55    | 7.987     | 3570   | MPI-BGC                   | jfj_surface-flask_45_representative   |
| 100 | OXK | Ochsenkopf                                                   | 50.0301  | 11.8084   | 1022   | MPI-BGC                   | oxk_surface-flask_45_representative   |
| 101 | CVO | Cape Verde Observatory                                       | 16.864   | -24.8675  | 10     | MPI-BGC                   | cvo_surface-flask_45_representative   |
| 102 | ZOT | Zotino, Siberia                                              | 60.75    | 89.38     | 111    | MPI-BGC                   | zot_surface-flask_45_representative   |
| 103 | CGO | Cape Grim, Tasmania                                          | -40.683  | 144.69    | 94     | MPI-BGC                   | cgo_surface-flask_45_representative   |
| 104 | BIK | Bialystok                                                    | 53.2     | 22.75     | 183    | MPI-BGC                   | bik_surface-flask_45_representative   |
| 105 | GVN | Neumayer Station                                             | -70.67   | -8.27     | 40     | MPI-BGC                   | gvn_surface-flask_45_representative   |
| 106 | VRS | Villum Research Station; Station Nord                        | 81.58    | -16.64    | 24     | MPI-BGC                   | vrs_surface-flask_45_representative   |
| 107 | BIK | Bialystok                                                    | 53.2     | 22.75     | 183    | MPI-BGC,ICOS RI,ICOS-ATC  | bik_tower-insitu_45_allvalid-300magl  |
| 108 | BIR | Birkenes Observatory                                         | 58.3886  | 8.2519    | 215    | NILU,ICOS RI,ICOS-ATC     | bir_tower-insitu_56_allvalid-75magl   |
| 109 | ZEP | Ny-Alesund, Svalbard                                         | 78.9067  | 11.8883   | 474    | NILU,ICOS-ATC,ICOS RI     | zep_surface-insitu_56_allvalid        |
| 110 | BHD | Baring Head Station                                          | -41.4083 | 174.871   | 85     | NIWA                      | bhd_surface-insitu_15_baseline        |
| 111 | SMO | Tutuila                                                      | -14.2474 | -170.5644 | 42     | NOAA                      | smo_surface-flask_1_representative    |
| 112 | CRV | Carbon in Arctic Reservoirs Vulnerability Experiment (CARVE) | 64.9863  | -147.598  | 611.43 | NOAA                      | crv_tower-insitu_1_allvalid-32magl    |
| 113 | BRW | Barrow Atmospheric Baseline Observatory                      | 71.323   | -156.6114 | 11     | NOAA                      | brw_surface-insitu_1_allvalid         |
| 114 | DRP | Drake Passage                                                | -59      | -64.69    | 0      | NOAA                      | drp_shipboard-flask_1_representative  |
| 115 | MLO | Mauna Loa, Hawaii                                            | 19.5362  | -155.5763 | 3397   | NOAA                      | mlo_surface-insitu_1_allvalid         |
| 116 | ZEP | Ny-Alesund, Svalbard                                         | 78.9067  | 11.8883   | 474    | NOAA                      | zep_surface-flask_1_representative    |
| 117 | HUN | Hegyhatsal                                                   | 46.9559  | 16.6521   | 248    | NOAA                      | hun_surface-flask_1_representative    |
| 118 | CBA | Cold Bay, Alaska                                             | 55.21    | -162.72   | 21.34  | NOAA                      | cba_surface-flask_1_representative    |
| 119 | CRV | Carbon in Arctic Reservoirs Vulnerability Experiment (CARVE) | 64.9863  | -147.598  | 611.43 | NOAA                      | crv_surface-pfp_1_allvalid-32magl     |
| 120 | SPO | South Pole, Antarctica                                       | -89.98   | -24.8     | 2810   | NOAA                      | spo_surface-flask_1_representative    |
| 121 | TAP | Tae-ahn Peninsula                                            | 36.7376  | 126.1328  | 16     | NOAA                      | tap_surface-flask_1_representative    |
| 122 | PAL | Pallas-Sammaltunturi, GAW Station                            | 67.9733  | 24.1157   | 565    | NOAA                      | pal_surface-flask_1_representative    |
| 123 | NAT | Farol De Mae Luiza Lighthouse                                | -5.7952  | -35.1853  | 50     | NOAA                      | nat_surface-flask_1_representative    |
| 124 | ALT | Alert, Nunavut                                               | 82.4508  | -62.5072  | 185    | NOAA                      | alt_surface-flask_1_representative    |
| 125 | NMB | Gobabeb                                                      | -23.58   | 15.03     | 456    | NOAA                      | nmb_surface-flask_1_representative    |
| 126 | AZR | Terceira Island, Azores                                      | 38.766   | -27.375   | 19     | NOAA                      | azr_surface-flask_1_representative    |
| 127 | SGP | Southern Great Plains, Oklahoma                              | 36.607   | -97.489   | 314    | NOAA                      | sgp_surface-flask_1_representative    |
| 128 | LEW | Lewisburg, Pennsylvania                                      | 40.9446  | -76.8789  | 166    | NOAA                      | lew_surface-pfp_1_allvalid-95magl     |
| 129 | PSA | Palmer Station, Antarctica                                   | -64.7742 | -64.0527  | 10     | NOAA                      | psa_surface-flask_1_representative    |

|     |      |                                                              |          |           |         |            |                                      |
|-----|------|--------------------------------------------------------------|----------|-----------|---------|------------|--------------------------------------|
| 130 | THD  | Trinidad Head, California                                    | 41.0541  | -124.151  | 107     | NOAA       | thd_surface-flask_1_representative   |
| 131 | WKT  | Moody, Texas                                                 | 31.3149  | -97.3269  | 251     | NOAA       | wkt_surface-pfp_1_allvalid-457magl   |
| 132 | EIC  | Easter Island                                                | -27.1597 | -109.4284 | 47      | NOAA       | eic_surface-flask_1_representative   |
| 133 | ASK  | Assekrem                                                     | 23.2625  | 5.6322    | 2710    | NOAA       | ask_surface-flask_1_representative   |
| 134 | ASC  | Ascension Island                                             | -7.9667  | -14.4     | 85      | NOAA       | asc_surface-flask_1_representative   |
| 135 | NWR  | Niwot Ridge, Colorado                                        | 40.0531  | -105.5864 | 3523    | NOAA       | nwr_surface-pfp_1_allvalid-3magl     |
| 136 | SHM  | Shemya Island, Alaska                                        | 52.7112  | 174.126   | 23      | NOAA       | shm_surface-flask_1_representative   |
| 137 | HPB  | Hohenpeissenberg                                             | 47.8011  | 11.0245   | 985     | NOAA       | hpb_surface-flask_1_representative   |
| 138 | HBA  | Halley Station, Antarctica                                   | -75.605  | -26.21    | 30      | NOAA       | hba_surface-flask_1_representative   |
| 139 | KUM  | Cape Kumukahi, Hawaii                                        | 19.5608  | -154.8883 | 8       | NOAA       | kum_surface-flask_1_representative   |
| 140 | HSU  | Humboldt State University                                    | 41.0588  | -124.75   | 0       | NOAA       | hsu_surface-flask_1_representative   |
| 141 | BKT  | Bukit Kototabang                                             | -0.202   | 100.318   | 845     | NOAA       | bkt_surface-flask_1_representative   |
| 142 | ICE  | Storhofdi, Vestmannaeyjar                                    | 63.3998  | -20.2884  | 118     | NOAA       | ice_surface-flask_1_representative   |
| 143 | MHD  | Mace Head, County Galway                                     | 53.326   | -9.899    | 5       | NOAA       | mhd_surface-flask_1_representative   |
| 144 | MWO  | Mt. Wilson Observatory                                       | 34.2246  | -118.0586 | 1729.33 | NOAA       | mwo_surface-pfp_1_allvalid-46magl    |
| 145 | KEY  | Key Biscayne, Florida                                        | 25.6654  | -80.158   | 1       | NOAA       | key_surface-flask_1_representative   |
| 146 | NWR  | Niwot Ridge, Colorado                                        | 40.0531  | -105.5864 | 3523    | NOAA       | nwr_surface-flask_1_representative   |
| 147 | MLO  | Mauna Loa, Hawaii                                            | 19.5362  | -155.5763 | 3397    | NOAA       | mlo_surface-flask_1_representative   |
| 148 | MID  | Sand Island, Midway                                          | 28.2186  | -177.3678 | 4.6     | NOAA       | mid_surface-flask_1_representative   |
| 149 | BAO  | Boulder Atmospheric Observatory, Colorado                    | 40.05    | -105.004  | 1578.7  | NOAA       | bao_surface-pfp_1_allvalid-300magl   |
| 150 | BRW  | Barrow Atmospheric Baseline Observatory                      | 71.323   | -156.6114 | 11      | NOAA       | brw_surface-flask_1_representative   |
| 151 | WLG  | Mt. Waliguan                                                 | 36.2879  | 100.8964  | 3810    | NOAA       | wlg_surface-flask_1_representative   |
| 152 | DSI  | Dongsha Island                                               | 20.6992  | 116.7297  | 3       | NOAA       | dsi_surface-flask_1_representative   |
| 153 | TIK  | Hydrometeorological Observatory of Tiksi                     | 71.5965  | 128.8887  | 19      | NOAA       | tik_surface-flask_1_representative   |
| 154 | GMI  | Mariana Islands                                              | 13.386   | 144.656   | 0       | NOAA       | gmi_surface-flask_1_representative   |
| 155 | SDZ  | Shangdianzi                                                  | 40.65    | 117.117   | 293     | NOAA       | sdz_surface-flask_1_representative   |
| 156 | UUM  | Ulaan Uul                                                    | 44.4516  | 111.0956  | 1007    | NOAA       | uum_surface-flask_1_representative   |
| 157 | CIB  | Centro de Investigacion de la Baja Atmosfera (CIBA)          | 41.81    | -4.93     | 845     | NOAA       | cib_surface-flask_1_representative   |
| 158 | RPB  | Ragged Point                                                 | 13.165   | -59.432   | 15      | NOAA       | rpb_surface-flask_1_representative   |
| 159 | OXK  | Ochsenkopf                                                   | 50.0301  | 11.8084   | 1022    | NOAA       | oxk_surface-flask_1_representative   |
| 160 | WBI  | West Branch, Iowa                                            | 41.7248  | -91.3529  | 241.7   | NOAA       | wbi_surface-pfp_1_allvalid-379magl   |
| 161 | USH  | Ushuaia                                                      | -54.8484 | -68.3106  | 12      | NOAA       | ush_surface-flask_1_representative   |
| 162 | AMT  | Argyle, Maine                                                | 45.0345  | -68.6821  | 52.4    | NOAA       | amt_surface-pfp_1_allvalid-107magl   |
| 163 | CGO  | Cape Grim, Tasmania                                          | -40.683  | 144.69    | 94      | NOAA       | cgo_surface-flask_1_representative   |
| 164 | SYO  | Syowa Station, Antarctica                                    | -69.0125 | 39.59     | 14      | NOAA       | syo_surface-flask_1_representative   |
| 165 | AMY  | Anmyeon-do                                                   | 36.5389  | 126.3295  | 47      | NOAA       | amy_surface-flask_1_representative   |
| 166 | TAC  | Tacolneston                                                  | 52.5177  | 1.1386    | 56      | NOAA       | tac_surface-flask_1_representative   |
| 167 | LMP  | Lampedusa                                                    | 35.5181  | 12.6322   | 45      | NOAA       | lmp_surface-flask_1_representative   |
| 168 | SUM  | Summit                                                       | 72.5962  | -38.422   | 3209.54 | NOAA       | sum_surface-flask_1_representative   |
| 169 | IZO  | Izana, Tenerife, Canary Islands                              | 28.309   | -16.499   | 2372.9  | NOAA       | izo_surface-flask_1_representative   |
| 170 | WIS  | Weizmann Institute of Science at the Arava Institute, Ketura | 29.9646  | 35.0605   | 151     | NOAA       | wis_surface-flask_1_representative   |
| 171 | BMW  | Tudor Hill, Bermuda                                          | 32.2647  | -64.8788  | 30      | NOAA       | bmw_surface-flask_1_representative   |
| 172 | LLN  | Lulin                                                        | 23.47    | 120.87    | 2862    | NOAA       | lln_surface-flask_1_representative   |
| 173 | UTA  | Wendover, Utah                                               | 39.9018  | -113.7181 | 1327    | NOAA       | uta_surface-flask_1_representative   |
| 174 | MEX  | High Altitude Global Climate Observation Center              | 18.9841  | -97.311   | 4464    | NOAA       | mex_surface-flask_1_representative   |
| 175 | CRZ  | Crozet Island                                                | -46.4337 | 51.8478   | 197     | NOAA       | crz_surface-flask_1_representative   |
| 176 | SEY  | Mahe Island                                                  | -4.6824  | 55.5325   | 2       | NOAA       | sey_surface-flask_1_representative   |
| 177 | CPT  | Cape Point                                                   | -34.3523 | 18.4891   | 230     | NOAA       | cpt_surface-flask_1_representative   |
| 178 | POC  | Pacific Ocean                                                | -1E+34   | -1E+34    | 0       | NOAA       | poc_shipboard-flask_1_representative |
| 179 | MBO  | Mt. Bachelor Observatory                                     | 43.9775  | -121.6861 | 2731    | NOAA       | mbo_surface-pfp_1_allvalid-11magl    |
| 180 | BHD  | Baring Head Station                                          | -41.4083 | 174.871   | 85      | NOAA       | bhd_surface-flask_1_representative   |
| 181 | MRC  | Marcellus Pennsylvania                                       | 41.4662  | -76.4188  | 592     | NOAA       | mrc_surface-pfp_1_allvalid-east      |
| 182 | MRC  | Marcellus Pennsylvania                                       | 41.4662  | -76.4188  | 592     | NOAA       | mrc_surface-pfp_1_allvalid-south     |
| 183 | LEF  | Park Falls, Wisconsin                                        | 45.9451  | -90.2732  | 472     | NOAA       | lef_surface-flask_1_representative   |
| 184 | CHR  | Christmas Island                                             | 1.7      | -157.1518 | 0       | NOAA       | chr_surface-flask_1_representative   |
| 185 | MSH  | Mashpee, Massachusetts                                       | 41.6567  | -70.4975  | 32      | NOAA       | msh_surface-pfp_1_allvalid-46magl    |
| 186 | SGP  | Southern Great Plains, Oklahoma                              | 36.607   | -97.489   | 314     | NOAA       | sgp_surface-pfp_1_allvalid-60magl    |
| 187 | RVRB | R/V Ron Brown                                                | -1E+34   | -1E+34    | 0       | NOAA       | rvr_shipboard-insitu_1_allvalid      |
| 188 | MKO  | Mauna Kea, Hawaii                                            | 19.8228  | -155.4693 | 4199    | NOAA       | mko_surface-insitu_1_allvalid        |
| 189 | WGC  | Walnut Grove, California                                     | 38.2645  | -121.4904 | 2       | NOAA,LBNL  | wgc_tower-insitu_1_allvalid-483magl  |
| 190 | WGC  | Walnut Grove, California                                     | 38.2645  | -121.4904 | 2       | NOAA,LBNL  | wgc_surface-pfp_1_allvalid-484magl   |
| 191 | STR  | Sutro Tower, San Francisco, California                       | 37.7553  | -122.4528 | 254     | NOAA,LBNL  | str_surface-pfp_1_allvalid-232magl   |
| 192 | WGC  | Walnut Grove, California                                     | 38.2645  | -121.4904 | 2       | NOAA,LBNL  | wgc_surface-pfp_1_allvalid-89magl    |
| 193 | SCT  | Beech Island, South Carolina                                 | 33.4057  | -81.8334  | 115.2   | NOAA,SRNL  | sct_surface-pfp_1_allvalid-305magl   |
| 194 | SCT  | Beech Island, South Carolina                                 | 33.4057  | -81.8334  | 115.2   | NOAA,SRNL  | sct_tower-insitu_1_allvalid-305magl  |
| 195 | LEF  | Park Falls, Wisconsin                                        | 45.9451  | -90.2732  | 472     | NOAA,UoFWI | lef_tower-insitu_1_allvalid-396magl  |

|                 |       |                                |          |           |        |                           |                                         |
|-----------------|-------|--------------------------------|----------|-----------|--------|---------------------------|-----------------------------------------|
| 196             | LEF   | Park Falls, Wisconsin          | 45.9451  | -90.2732  | 472    | NOAA,UofWI                | lef_surface-pfp_1_allvalid-396magl      |
| 197             | CRP   | Carnsore Point                 | 52.18    | -6.37     | 9      | NUI-Galway,ICOS RI        | crp_surface-insitu_137_allvalid         |
| 198             | MRC   | Marcellus Pennsylvania         | 41.4662  | -76.4188  | 592    | PSU                       | mrc_tower-insitu_60_allvalid-south      |
| 199             | GCI03 | Magee, Mississippi             | 31.8869  | -89.7276  | 132    | PSU                       | gci03_tower-insitu_60_allvalid          |
| 200             | DVV   | Danville, Virginia             | 36.7058  | -79.4369  | 277    | PSU                       | dvv_tower-insitu_60_allvalid            |
| 201             | GCI02 | Grenada, Mississippi           | 33.7525  | -89.8539  | 105    | PSU                       | gci02_tower-insitu_60_allvalid          |
| 202             | WSD   | Wessington, South Dakota       | 44.0502  | -98.588   | 592    | PSU                       | wsd_tower-insitu_60_allvalid            |
| 203             | GCI04 | Millerville, AL                | 33.1759  | -85.8911  | 328    | PSU                       | gci04_tower-insitu_60_allvalid          |
| 204             | GCI01 | Monroe, Louisana               | 32.469   | -92.2829  | 65     | PSU                       | gci01_tower-insitu_60_allvalid          |
| 205             | NOTR  | Notrees                        | 31.9657  | 102.7699  | 1015   | PSU                       | notr_surface-insitu_60_allvalid-91magl  |
| 206             | HOBBS | Hobbs                          | 32.7135  | -103.0913 | 1103   | PSU                       | hobb_surface-insitu_60_allvalid-91magl  |
| 207             | FORT  | Fort Stockton                  | 30.8666  | -102.815  | 987    | PSU                       | fort_surface-insitu_60_allvalid-128magl |
| 208             | CARL  | Carlsbad Caverns National Park | 32.1783  | -104.4406 | 1349   | PSU                       | carl_surface-insitu_60_allvalid-9magl   |
| 209             | MALJ  | Maljamar                       | 32.8671  | -103.7608 | 1310   | PSU                       | malj_surface-insitu_60_allvalid-134magl |
| 210             | PRS   | Plateau Rosa Station           | 45.93    | 7.7       | 3480   | RSE,ICOS RI,ICOS-ATC      | prs_surface-insitu_21_allvalid          |
| 211             | LUT   | Lutjewad                       | 53.4037  | 6.3529    | 1      | RUG,ICOS RI,ICOS-ATC      | lut_surface-insitu_44_allvalid          |
| 212             | CPT   | Cape Point                     | -34.3523 | 18.4891   | 230    | SAWS                      | cpt_surface-insitu_36_marine            |
| 213             | SVB   | Svartberget                    | 64.256   | 19.775    | 235    | SLU,ICOS-ATC,ICOS RI      | svb_tower-insitu_440_allvalid-150magl   |
| 214             | CBW   | Cabauw                         | 51.9703  | 4.9264    | 0      | TNO,ICOS RI               | cbw_tower-insitu_445_allvalid-207magl   |
| 215             | SYO   | Syowa Station, Antarctica      | -69.0125 | 39.59     | 14     | TU,NIPR                   | syo_surface-insitu_8_representative     |
| 216             | ZSF   | Zugspitze / Schneefernerhaus   | 47.4165  | 10.9796   | 2666   | UBA-Germany,ICOS-ATC      | zsf_surface-insitu_25_allvalid          |
| 217             | WES   | Westerland                     | 55       | 8         | 8      | UBA-Germany,ICOS-ATC      | wes_surface-insitu_25_allvalid          |
| 218             | WAO   | Weybourne, Norfolk             | 52.9502  | 1.1219    | 29     | UEA,ICOS RI,ICOS-ATC      | wao_surface-insitu_13_allvalid          |
| 219             | HEI   | Heidelberg                     | 49.417   | 8.674     | 116    | UHEI-IUP                  | hei_surface-insitu_22_allvalid          |
| 220             | SMR   | Hyttiala                       | 61.8474  | 24.2948   | 181    | UHELs,ICOS-ATC,ICOS RI    | smr_tower-insitu_421_allvalid-125magl   |
| 221             | CMN   | Mt. Cimone Station             | 44.1936  | 10.6999   | 2165   | UNIURB                    | cmn_surface-insitu_106_allvalid         |
| 222             | TAC   | Tacolneston                    | 52.5177  | 1.1386    | 56     | UNIVBRIS                  | tac_tower-insitu_160_allvalid-185magl   |
| 223             | BSD   | Bilsdale                       | 54.359   | -1.15     | 380    | UNIVBRIS,ICOS RI          | bsd_tower-insitu_160_allvalid-248magl   |
| 224             | RGL   | Ridge Hill                     | 51.9976  | -2.54     | 204    | UNIVBRIS,ICOS RI,ICOS-ATC | rgl_tower-insitu_160_allvalid-90magl    |
| JMA             |       |                                |          |           |        |                           |                                         |
| 225             | MNM   | Minamitorishima                | 24.28    | 153.98    | 8      | JMA                       | insitu                                  |
| 226             | RYO   | Ryori                          | 39.03    | 141.82    | 260    | JMA                       | insitu                                  |
| 227             | YON   | Yonagunijima                   | 24.47    | 123.02    | 30     | JMA                       | insitu                                  |
| NIES            |       |                                |          |           |        |                           |                                         |
| JR-STATION      |       |                                |          |           |        |                           |                                         |
| 228             | AZV   | Azovo                          | 54.705   | 73.0292   | 110    | NIES                      | insitu                                  |
| 229             | BRZ   | Berezorechka                   | 56.15    | 84.3333   | 168    | NIES                      | insitu                                  |
| 230             | DEM   | Demyanskoe                     | 59.7914  | 70.8711   | 63     | NIES                      | insitu                                  |
| 231             | KRS   | Karasevoe                      | 58.2456  | 82.4244   | 76     | NIES                      | insitu                                  |
| 232             | NOY   | Noyabrsk                       | 63.4292  | 75.78     | 108    | NIES                      | insitu                                  |
| 233             | VGN   | Vaganovo                       | 54.4972  | 62.3247   | 192    | NIES                      | insitu                                  |
| Japan sites     |       |                                |          |           |        |                           |                                         |
| 234             | COI   | Cape Ochi-Ishi                 | 43.1603  | 145.4974  | 94     | NIES                      | insitu                                  |
| 235             | HAT   | Hateruma                       | 24.0608  | 123.8093  | 47.3   | NIES                      | insitu                                  |
| 236             | HPO   | Mt. Happa Observatory          | 36.7     | 137.8     | 1856   | NIES                      | insitu                                  |
| 237             | MFJ   | Mt. Fuji                       | 35.3609  | 138.7271  | 3780   | NIES                      | flask                                   |
| Asian sites     |       |                                |          |           |        |                           |                                         |
| 238             | CLA   | Comilla                        | 23.434   | 91.184    | 30     | NIES                      | flask                                   |
| 239             | NTL   | Nainital                       | 29.36    | 79.46     | 1940   | NIES                      | flask                                   |
| 240             | DMV   | Danum Valley                   | 4.98     | 117.84    | 530    | NIES                      | flask                                   |
| Ship Obsrvation |       |                                |          |           |        |                           |                                         |
| 241             | NC2   | New Century 2                  | -1E+34   | -1E+34    | -1E+34 | NIES                      | insitu                                  |
| 242             | TF5   | Trans Future 5                 | -1E+34   | -1E+34    | -1E+34 | NIES                      | insitu                                  |
| 243             | TH1   | Trans Harmony 1                | -1E+34   | -1E+34    | -1E+34 | NIES                      | insitu                                  |
| 244             | NC2   | New Century 2                  | -1E+34   | -1E+34    | -1E+34 | NIES                      | flask                                   |
| 245             | TF5   | Trans Future 5                 | -1E+34   | -1E+34    | -1E+34 | NIES                      | flask                                   |
| 246             | Mirai | Mirai                          | -1E+34   | -1E+34    | -1E+34 | NIES                      | Insitu                                  |
